# Supplementary material for: Impact of preadmission treatment with calcium channel blockers or beta blockers on short-term mortality after stroke: a nationwide cohort study
Source: Springer Nature journal article supplement (doi:10.1186/s12883-015-0279-3), 2015-03-06
Supplement: MOESM1 [file 9742254]

**ONLINE SUPPLEMENT**

**Impact of Preadmission Treatment with Calcium Channel Blockers or  
Beta Blockers on Short-term Mortality after Stroke:  
A nationwide cohort study**

**Table S1. ICD and ATC codes.**

|                                                   |                                                                                                                                                               |
|---------------------------------------------------|---------------------------------------------------------------------------------------------------------------------------------------------------------------|
| <b>Stroke</b>                                     |                                                                                                                                                               |
| Ischemic stroke                                   | ICD-8: 433-434; ICD-10: I63-64                                                                                                                                |
| Intracerebral hemorrhage                          | ICD-8: 431; ICD-10: I61                                                                                                                                       |
| Subarachnoid hemorrhage                           | ICD-8: 430; ICD-10: I60                                                                                                                                       |
| CT scan                                           | ICD-10: UXCA                                                                                                                                                  |
| MRI scan                                          | ICD-10: UXMA                                                                                                                                                  |
| <b>Calcium channel blockers and beta blockers</b> |                                                                                                                                                               |
| Calcium channel blockers                          | ATC: C08                                                                                                                                                      |
| Beta blockers                                     | ATC: C07                                                                                                                                                      |
| <b>Comedications</b>                              |                                                                                                                                                               |
| Cardiovascular drugs                              |                                                                                                                                                               |
| ACE-Is                                            | ATC: C09A, C09B                                                                                                                                               |
| ARBs                                              | ATC: C09C, C09D                                                                                                                                               |
| Diuretics                                         | ATC: C03                                                                                                                                                      |
| Nitrates                                          | ATC: C01DA                                                                                                                                                    |
| Statins                                           | ATC: C10AA, C10B, B04AB                                                                                                                                       |
| Aspirin                                           | ATC: B01AC06, N02BA01                                                                                                                                         |
| Clopidogrel                                       | ATC: B01AC04                                                                                                                                                  |
| Vitamin K antagonists                             | ATC: B01AA03, B01AA04                                                                                                                                         |
| Other drugs                                       |                                                                                                                                                               |
| Systemic glucocorticoids                          | ATC: H02AB                                                                                                                                                    |
| SSRIs                                             | ATC: N06AB                                                                                                                                                    |
| Bisphosphonates                                   | ATC: M05BA-B                                                                                                                                                  |
| NSAIDs                                            | ATC: M01A                                                                                                                                                     |
| <b>Individual comorbidities</b>                   |                                                                                                                                                               |
| Cardiovascular diseases                           |                                                                                                                                                               |
| Congestive heart failure                          | ICD-8: 427.09, 427.10, 427.11, 427.19, 428.99, 782.49; ICD-10: I50, I11.0, I13.0, I13.2                                                                       |
| Myocardial infarction                             | ICD-8: 410; ICD-10: I21, I22, I23                                                                                                                             |
| Angina pectoris                                   | ICD-8: 413; ICD-10: I20.9, I25.1, I25.9                                                                                                                       |
| Atrial fibrillation or flutter                    | ICD-8: 427.93, 427.94; ICD-10: I48                                                                                                                            |
| Heart valve disease                               | ICD-8: 394-398; ICD-10: I05, I06, I07, I08.0, I09.8, I34-I37, I39.0, I39.3, I51.1A, Q22                                                                       |
| Intermittent arterial claudication                | ICD-8: 443.89-443.99; ICD-10: I73.9                                                                                                                           |
| Venous thromboembolism                            | ICD-8: 451.00; ICD-10: I80.1-3, I26                                                                                                                           |
| Hypertension                                      | ICD-8: 400-404; ICD-10: I10-I15                                                                                                                               |
| Other diseases                                    |                                                                                                                                                               |
| Obesity                                           | ICD-8: 277; ICD-10: E65-E68                                                                                                                                   |
| Diabetes                                          | ICD-8: 249-250; ICD-10: E10-E14, O24 (except O24.4), H36.0; ATC: A10B, A10A                                                                                   |
| Chronic kidney disease                            | ICD-8: 249.02, 250.02, 753.10-753.19, 582, 583, 584, 590.09, 593.20, 792; ICD-10: E10.2, E11.2, E14.2, N03, N05, N11.0, N14, N16, N18-N19, N26.9, Q61.1-Q61.4 |
| COPD                                              | ICD-8: 491-492; ICD-10: J41-44; ATC: R03                                                                                                                      |
| Alcoholism-related diseases                       | ICD-8: 291, 303, 456, 571.09, 571.10, 577.10; ICD-10: F10.1-9, G31.2, G62.1, G72.1, I42.6, K29.2, K86.0, Z72.1; ATC: N07BB                                    |
| Cancer                                            | ICD-8: 140-207; ICD-10: C00-C96                                                                                                                               |
| Dementia                                          | ICD-8: 290.09-290.19, 293.09; ICD-10: F00-F03, F05.1, G30                                                                                                     |

ACE-Is indicates angiotensin-converting enzyme inhibitors; ARBs, angiotensin receptor blockers; SSRIs, selective serotonin reuptake inhibitors; NSAIDs, nonsteroidal anti-inflammatory drugs; COPD, chronic obstructive pulmonary disease.

**Table S2. Sensitivity analysis: Preadmission calcium channel blocker or beta blocker use and 30-day mortality estimates following stroke, with confirmation of diagnosis with CT or MRI scan.**

|                                 | Calcium channel blocker       |                               |                       | Beta blocker                  |                               |                       |
|---------------------------------|-------------------------------|-------------------------------|-----------------------|-------------------------------|-------------------------------|-----------------------|
|                                 | Mortality risk,<br>% (95% CI) | Mortality rate ratio (95% CI) |                       | Mortality risk,<br>% (95% CI) | Mortality rate ratio (95% CI) |                       |
|                                 |                               | Unadjusted                    | Adjusted <sup>a</sup> |                               | Unadjusted                    | Adjusted <sup>a</sup> |
| <b>Ischemic stroke</b>          |                               |                               |                       |                               |                               |                       |
| Non-use                         | 9.2 (9.0-9.5)                 | 1 (reference)                 | 1 (reference)         | 8.7 (8.4-8.9)                 | 1 (reference)                 | 1 (reference)         |
| Former use                      | 12.0 (10.8-13.4)              | 1.32 (1.18-1.48)              | 1.03 (0.92-1.16)      | 12.6 (11.4-13.9)              | 1.48 (1.33-1.66)              | 1.07 (0.95-1.20)      |
| Current use                     | 11.5 (10.9-12.1)              | 1.26 (1.19-1.34)              | 1.00 (0.94-1.06)      | 12.9 (12.4-13.5)              | 1.53 (1.45-1.61)              | 1.03 (0.97-1.09)      |
| New use                         | 9.2 (8.3-10.3)                | 1.00 (0.89-1.13)              | 0.89 (0.79-1.00)      | 11.7 (10.7-12.8)              | 1.37 (1.24-1.51)              | 0.97 (0.87-1.08)      |
| Long-term use                   | 12.4 (11.7-13.1)              | 1.36 (1.27-1.45)              | 1.04 (0.97-1.11)      | 13.3 (12.7-14.0)              | 1.58 (1.49-1.67)              | 1.04 (0.98-1.11)      |
| <b>Intracerebral hemorrhage</b> |                               |                               |                       |                               |                               |                       |
| Non-use                         | 34.1 (33.1-35.1)              | 1 (reference)                 | 1 (reference)         | 33.3 (32.3-34.3)              | 1 (reference)                 | 1 (reference)         |
| Former use                      | 37.7 (32.5-43.4)              | 1.11 (0.92-1.34)              | 0.93 (0.77-1.12)      | 40.2 (35.2-45.6)              | 1.27 (1.07-1.51)              | 0.99 (0.83-1.19)      |
| Current use                     | 42.1 (39.2-45.2)              | 1.32 (1.19-1.46)              | 1.08 (0.97-1.20)      | 42.4 (40.1-44.7)              | 1.37 (1.27-1.49)              | 0.97 (0.88-1.07)      |
| New use                         | 38.5 (32.9-44.7)              | 1.18 (0.96-1.44)              | 1.02 (0.83-1.25)      | 43.7 (38.9-48.9)              | 1.45 (1.24-1.69)              | 1.04 (0.88-1.22)      |
| Long-term use                   | 43.3 (39.9-46.8)              | 1.37 (1.22-1.53)              | 1.10 (0.98-1.24)      | 42.2 (39.5-44.7)              | 1.35 (1.24-1.48)              | 0.95 (0.85-1.05)      |
| <b>Subarachnoid hemorrhage</b>  |                               |                               |                       |                               |                               |                       |
| Non-use                         | 23.1 (21.8-24.5)              | 1 (reference)                 | 1 (reference)         | 23.2 (21.9-24.6)              | 1 (reference)                 | 1 (reference)         |
| Former use                      | 34.1 (25.5-44.6)              | 1.59 (1.12-2.26)              | 1.10 (0.76-1.59)      | 29.1 (20.4-40.5)              | 1.31 (0.87-1.98)              | 0.66 (0.41-1.04)      |
| Current use                     | 34.3 (29.5-39.7)              | 1.61 (1.32-1.95)              | 1.07 (0.86-1.32)      | 33.6 (29.0-38.7)              | 1.54 (1.28-1.86)              | 0.92 (0.73-1.15)      |
| New use                         | 29.8 (21.2-40.8)              | 1.40 (0.94-2.08)              | 0.95 (0.63-1.43)      | 28.2 (20.2-38.7)              | 1.22 (0.82-1.80)              | 0.65 (0.42-1.00)      |
| Long-term use                   | 35.8 (30.2-42.1)              | 1.68 (1.35-2.09)              | 1.10 (0.87-1.39)      | 35.4 (30.1-41.3)              | 1.66 (1.35-2.04)              | 0.98 (0.76-1.26)      |

<sup>a</sup>Adjusted for sex, age groups, and individual comorbidities and comedICATIONS listed in Table 1.

**Table S3. Sensitivity analysis: Preadmission calcium channel blocker or beta blocker use and 30-day mortality estimates following stroke, with 60-day exposure window.**

|                                 | Calcium channel blocker       |                               |                       | Beta blocker                  |                               |                       |
|---------------------------------|-------------------------------|-------------------------------|-----------------------|-------------------------------|-------------------------------|-----------------------|
|                                 | Mortality risk,<br>% (95% CI) | Mortality rate ratio (95% CI) |                       | Mortality risk,<br>% (95% CI) | Mortality rate ratio (95% CI) |                       |
|                                 |                               | Unadjusted                    | Adjusted <sup>a</sup> |                               | Unadjusted                    | Adjusted <sup>a</sup> |
| <b>Ischemic stroke</b>          |                               |                               |                       |                               |                               |                       |
| Non-use                         | 10.3 (10.1-10.5)              | 1 (reference)                 | 1 (reference)         | 9.8 (9.5-10.0)                | 1 (reference)                 | 1 (reference)         |
| Former use                      | 12.6 (11.8-13.4)              | 1.24 (1.15-1.33)              | 1.02 (0.95-1.10)      | 13.0 (12.2-13.8)              | 1.36 (1.26-1.46)              | 1.01 (0.93-1.09)      |
| Current use                     | 12.5 (11.9-13.2)              | 1.23 (1.16-1.30)              | 0.99 (0.93-1.06)      | 14.1 (13.5-14.6)              | 1.47 (1.40-1.55)              | 1.01 (0.95-1.06)      |
| New use                         | 8.6 (7.4-9.9)                 | 0.82 (0.70-0.96)              | 0.80 (0.68-0.94)      | 13.4 (12.1-14.9)              | 1.40 (1.25-1.58)              | 1.07 (0.95-1.21)      |
| Long-term use                   | 13.4 (12.7-14.2)              | 1.32 (1.24-1.41)              | 1.03 (0.96-1.10)      | 14.2 (13.5-14.8)              | 1.48 (1.41-1.57)              | 1.00 (0.94-1.06)      |
| <b>Intracerebral hemorrhage</b> |                               |                               |                       |                               |                               |                       |
| Non-use                         | 34.1 (33.2-35.0)              | 1 (reference)                 | 1 (reference)         | 33.3 (32.4-34.3)              | 1 (reference)                 | 1 (reference)         |
| Former use                      | 39.5 (35.8-43.4)              | 1.20 (1.05-1.36)              | 1.00 (0.87-1.14)      | 39.9 (36.6-43.5)              | 1.27 (1.12-1.42)              | 0.94 (0.83-1.07)      |
| Current use                     | 41.2 (38.0-44.5)              | 1.27 (1.14-1.42)              | 1.04 (0.93-1.16)      | 42.6 (40.1-45.1)              | 1.38 (1.27-1.50)              | 0.96 (0.87-1.06)      |
| New use                         | 34.9 (27.5-43.6)              | 1.00 (0.75-1.33)              | 0.88 (0.66-1.17)      | 42.9 (36.4-49.9)              | 1.42 (1.15-1.75)              | 0.97 (0.77-1.20)      |
| Long-term use                   | 42.4 (38.9-46.0)              | 1.33 (1.18-1.49)              | 1.07 (0.94-1.20)      | 42.5 (39.9-45.3)              | 1.37 (1.26-1.50)              | 0.95 (0.86-1.05)      |
| <b>Subarachnoid hemorrhage</b>  |                               |                               |                       |                               |                               |                       |
| Non-use                         | 22.6 (21.3-23.9)              | 1 (reference)                 | 1 (reference)         | 22.8 (21.6-24.2)              | 1 (reference)                 | 1 (reference)         |
| Former use                      | 31.5 (25.6-38.3)              | 1.48 (1.15-1.90)              | 1.02 (0.78-1.32)      | 23.9 (18.5-30.7)              | 1.07 (0.79-1.44)              | 0.61 (0.44-0.85)      |
| Current use                     | 33.8 (28.5-39.8)              | 1.60 (1.29-1.99)              | 1.06 (0.84-1.34)      | 34.2 (29.2-39.7)              | 1.60 (1.31-1.95)              | 0.96 (0.76-1.22)      |
| New use                         | 23.9 (14.0-39.0)              | 1.10 (0.61-1.99)              | 0.79 (0.43-1.45)      | 34.5 (23.8-48.2)              | 1.56 (1.00-2.42)              | 0.84 (0.52-1.35)      |
| Long-term use                   | 35.8 (29.9-42.5)              | 1.71 (1.36-2.15)              | 1.11 (0.86-1.41)      | 34.1 (28.7-40.3)              | 1.61 (1.29-2.00)              | 0.97 (0.75-1.25)      |

<sup>a</sup>Adjusted for sex, age groups, and individual comorbidities and comedications listed in Table 1.

**Table S4. Sensitivity analysis: Preadmission calcium channel blocker or beta blocker use and 30-day mortality estimates following stroke, with 30-day exposure window.**

|                                 | Calcium channel blocker       |                               |                       | Beta blocker                  |                               |                       |
|---------------------------------|-------------------------------|-------------------------------|-----------------------|-------------------------------|-------------------------------|-----------------------|
|                                 | Mortality risk,<br>% (95% CI) | Mortality rate ratio (95% CI) |                       | Mortality risk,<br>% (95% CI) | Mortality rate ratio (95% CI) |                       |
|                                 |                               | Unadjusted                    | Adjusted <sup>a</sup> |                               | Unadjusted                    | Adjusted <sup>a</sup> |
| <b>Ischemic stroke</b>          |                               |                               |                       |                               |                               |                       |
| Non-use                         | 10.3 (10.1-10.5)              | 1 (reference)                 | 1 (reference)         | 9.8 (9.5-10.0)                | 1 (reference)                 | 1 (reference)         |
| Former use                      | 12.4 (11.8-13.1)              | 1.22 (1.15-1.29)              | 1.02 (0.95-1.08)      | 12.8 (12.2-13.4)              | 1.33 (1.26-1.41)              | 0.99 (0.93-1.05)      |
| Current use                     | 12.8 (11.9-13.6)              | 1.25 (1.16-1.35)              | 0.98 (0.91-1.06)      | 15.0 (14.2-15.8)              | 1.58 (1.48-1.68)              | 1.03 (0.96-1.10)      |
| New use                         | 8.3 (6.7-10.2)                | 0.79 (0.63-0.99)              | 0.79 (0.63-0.98)      | 12.4 (10.6-14.5)              | 1.29 (1.09-1.52)              | 1.01 (0.86-1.20)      |
| Long-term use                   | 13.6 (12.7-14.6)              | 1.34 (1.24-1.45)              | 1.01 (0.93-1.10)      | 15.4 (14.6-16.2)              | 1.62 (1.52-1.73)              | 1.04 (0.97-1.11)      |
| <b>Intracerebral hemorrhage</b> |                               |                               |                       |                               |                               |                       |
| Non-use                         | 34.1 (33.2-35.0)              | 1 (reference)                 | 1 (reference)         | 33.3 (32.4-34.3)              | 1 (reference)                 | 1 (reference)         |
| Former use                      | 40.1 (37.1-43.2)              | 1.22 (1.10-1.36)              | 1.01 (0.91-1.13)      | 40.7 (38.2-43.3)              | 1.30 (1.19-1.42)              | 0.96 (0.87-1.06)      |
| Current use                     | 41.2 (37.1-45.5)              | 1.28 (1.11-1.47)              | 1.03 (0.90-1.19)      | 43.3 (40.1-46.6)              | 1.40 (1.26-1.56)              | 0.93 (0.83-1.05)      |
| New use                         | 31.1 (21.9-43.0)              | 0.88 (0.58-1.32)              | 0.80 (0.53-1.20)      | 40.2 (31.0-51.0)              | 1.29 (0.93-1.78)              | 0.88 (0.63-1.22)      |
| Long-term use                   | 42.9 (38.4-47.6)              | 1.35 (1.17-1.56)              | 1.07 (0.92-1.25)      | 43.6 (40.3-47.2)              | 1.42 (1.27-1.58)              | 0.93 (0.83-1.06)      |
| <b>Subarachnoid hemorrhage</b>  |                               |                               |                       |                               |                               |                       |
| Non-use                         | 22.6 (21.3-23.9)              | 1 (reference)                 | 1 (reference)         | 22.8 (21.6-24.2)              | 1 (reference)                 | 1 (reference)         |
| Former use                      | 33.6 (28.8-38.9)              | 1.59 (1.31-1.93)              | 1.07 (0.87-1.32)      | 27.6 (23.1-32.8)              | 1.25 (1.01-1.56)              | 0.75 (0.59-0.97)      |
| Current use                     | 30.7 (23.8-39.1)              | 1.45 (1.07-1.96)              | 0.97 (0.71-1.34)      | 35.4 (28.9-42.9)              | 1.66 (1.28-2.14)              | 0.95 (0.70-1.27)      |
| New use                         | 21.1 (8.5-46.8)               | 0.97 (0.36-2.59)              | 0.97 (0.36-2.63)      | 31.8 (16.6-55.4)              | 1.39 (0.66-2.92)              | 0.77 (0.35-1.69)      |
| Long-term use                   | 32.3 (24.7-41.4)              | 1.52 (1.11-2.10)              | 0.97 (0.69-1.36)      | 35.9 (28.9-44.0)              | 1.70 (1.30-2.23)              | 0.96 (0.71-1.31)      |

<sup>a</sup>Adjusted for sex, age groups, and individual comorbidities and comedications listed in Table 1.

**Table S5. Sensitivity analysis: Current vs. former calcium channel blocker or beta blocker use and 30-day mortality estimates following stroke.**

|                                          | Calcium channel blocker       |                       | Beta blocker                  |                       |
|------------------------------------------|-------------------------------|-----------------------|-------------------------------|-----------------------|
|                                          | Mortality rate ratio (95% CI) |                       | Mortality rate ratio (95% CI) |                       |
|                                          | Unadjusted                    | Adjusted <sup>a</sup> | Unadjusted                    | Adjusted <sup>a</sup> |
| Ischemic stroke (current users)          | 0.94 (0.85-1.06)              | 0.94 (0.84-1.05)      | 1.07 (0.97-1.19)              | 1.00 (0.90-1.11)      |
| Intracerebral hemorrhage (current users) | 1.16 (0.95-1.41)              | 1.20 (0.98-1.47)      | 1.05 (0.88-1.25)              | 0.99 (0.83-1.19)      |
| Subarachnoid hemorrhage (current users)  | 1.03 (0.71-1.50)              | 0.97 (0.66-1.43)      | 1.30 (0.84-2.03)              | 1.39 (0.86-2.23)      |

<sup>a</sup>Adjusted for sex, age groups, and individual comorbidities and comedICATIONS listed in Table 1.

**Table S6. Sensitivity analysis: Preadmission use of calcium channel blockers or beta blockers and 30-day mortality estimates following ischemic stroke (combined, specified, and unspecified).**

|                                             | Calcium channel blocker       |                               |                       | Beta blocker                  |                               |                       |
|---------------------------------------------|-------------------------------|-------------------------------|-----------------------|-------------------------------|-------------------------------|-----------------------|
|                                             | Mortality risk,<br>% (95% CI) | Mortality rate ratio (95% CI) |                       | Mortality risk,<br>% (95% CI) | Mortality rate ratio (95% CI) |                       |
|                                             |                               | Unadjusted                    | Adjusted <sup>a</sup> |                               | Unadjusted                    | Adjusted <sup>a</sup> |
| <b>Combined ischemic stroke (I63 + I64)</b> |                               |                               |                       |                               |                               |                       |
| Nonuse                                      | 10.3 (10.1-10.5)              | 1 (reference)                 | 1 (reference)         | 9.8 (9.5-10.0)                | 1 (reference)                 | 1 (reference)         |
| Former use                                  | 13.1 (11.9-14.3)              | 1.29 (1.16-1.43)              | 1.04 (0.94-1.15)      | 13.0 (11.8-14.2)              | 1.35 (1.22-1.49)              | 1.01 (0.91-1.12)      |
| Current use                                 | 12.4 (11.9-13.0)              | 1.22 (1.15-1.29)              | 0.99 (0.94-1.05)      | 13.9 (13.3-14.4)              | 1.45 (1.38-1.52)              | 1.01 (0.96-1.07)      |
| New use                                     | 10.1 (9.1-11.1)               | 0.97 (0.88-1.08)              | 0.89 (0.80-0.99)      | 12.6 (11.6-13.6)              | 1.31 (1.19-1.43)              | 0.97 (0.88-1.06)      |
| Long-term use                               | 13.3 (12.6-14.0)              | 1.31 (1.24-1.39)              | 1.03 (0.97-1.10)      | 14.3 (13.7-14.9)              | 1.50 (1.42-1.58)              | 1.02 (0.96-1.08)      |
| <b>Specified ischemic stroke (I64)</b>      |                               |                               |                       |                               |                               |                       |
| Nonuse                                      | 8.1 (7.85-8.37)               | 1 (reference)                 | 1 (reference)         | 7.5 (7.3-7.8)                 | 1 (reference)                 | 1 (reference)         |
| Former use                                  | 10.7 (9.39-12.24)             | 1.35 (1.17-1.56)              | 1.09 (0.94-1.26)      | 10.8 (9.4-12.2)               | 1.45 (1.26-1.67)              | 1.01 (0.87-1.17)      |
| Current use                                 | 10.3 (9.66-11.00)             | 1.29 (1.19-1.39)              | 1.03 (0.95-1.11)      | 11.9 (11.3-12.6)              | 1.62 (1.52-1.73)              | 1.04 (0.97-1.13)      |
| New use                                     | 8.5 (7.40-9.73)               | 1.05 (0.91-1.22)              | 0.95 (0.82-1.10)      | 10.4 (9.3-11.7)               | 1.41 (1.24-1.60)              | 0.96 (0.84-1.10)      |
| Long-term use                               | 11.0 (10.22-11.84)            | 1.38 (1.27-1.50)              | 1.05 (0.96-1.15)      | 12.4 (11.7-13.1)              | 1.69 (1.57-1.82)              | 1.06 (0.98-1.16)      |
| <b>Unspecified stroke (I64)</b>             |                               |                               |                       |                               |                               |                       |
| Nonuse                                      | 13.8 (13.35-14.19)            | 1 (reference)                 | 1 (reference)         | 13.3 (12.9-13.8)              | 1 (reference)                 | 1 (reference)         |
| Former use                                  | 16.7 (14.72-19.00)            | 1.23 (1.06-1.42)              | 1.00 (0.87-1.16)      | 16.5 (14.5-18.7)              | 1.26 (1.09-1.45)              | 1.03 (0.89-1.20)      |
| Current use                                 | 15.6 (14.68-16.66)            | 1.15 (1.06-1.24)              | 0.97 (0.89-1.05)      | 16.8 (15.9-17.7)              | 1.29 (1.20-1.38)              | 0.99 (0.92-1.07)      |
| New use                                     | 12.6 (10.92-14.43)            | 0.91 (0.78-1.05)              | 0.84 (0.72-0.99)      | 15.9 (14.2-17.7)              | 1.20 (1.06-1.37)              | 0.99 (0.87-1.13)      |
| Long-term use                               | 16.8 (15.60-17.98)            | 1.24 (1.14-1.35)              | 1.02 (0.93-1.11)      | 17.1 (16.1-18.2)              | 1.31 (1.22-1.41)              | 0.99 (0.91-1.08)      |

<sup>a</sup>Adjusted for sex, age groups, and individual comorbidities and comedications listed in Table 1.

**Table S7. Thirty-day mortality rate ratios following ischemic stroke, intracerebral hemorrhage, and subarachnoid hemorrhage, by sex, age, and comorbidity among current vs. non-users of calcium channel blockers or beta blockers.**

|                                   | Calcium channel blocker                     |                  |                  | Beta blocker     |                  |                  |
|-----------------------------------|---------------------------------------------|------------------|------------------|------------------|------------------|------------------|
|                                   | Mortality rate ratios (95% CI) <sup>a</sup> |                  |                  |                  |                  |                  |
|                                   | Ischemic stroke                             | ICH              | SAH              | Ischemic stroke  | ICH              | SAH              |
| <b>Sex</b>                        |                                             |                  |                  |                  |                  |                  |
| Male                              | 0.97 (0.88-1.06)                            | 0.97 (0.84-1.12) | 1.02 (0.74-1.40) | 1.01 (0.92-1.09) | 0.93 (0.81-1.06) | 0.81 (0.58-1.14) |
| Female                            | 1.00 (0.93-1.08)                            | 1.13 (0.99-1.30) | 1.03 (0.78-1.36) | 1.01 (0.94-1.08) | 0.98 (0.86-1.11) | 0.97 (0.73-1.30) |
| <b>Age</b>                        |                                             |                  |                  |                  |                  |                  |
| <60                               | 0.80 (0.57-1.12)                            | 0.65 (0.43-0.97) | 1.00 (0.59-1.71) | 1.02 (0.76-1.37) | 1.26 (0.92-1.71) | 1.00 (0.60-1.67) |
| 60-69                             | 0.83 (0.69-1.00)                            | 1.03 (0.80-1.33) | 0.97 (0.59-1.57) | 1.06 (0.89-1.25) | 0.71 (0.56-0.91) | 0.90 (0.57-1.44) |
| 70-79                             | 0.99 (0.88-1.11)                            | 0.98 (0.81-1.17) | 1.13 (0.74-1.70) | 0.98 (0.88-1.10) | 1.06 (0.90-1.24) | 0.74 (0.48-1.16) |
| ≥80                               | 1.03 (0.96-1.10)                            | 1.19 (1.02-1.38) | 0.98 (0.69-1.39) | 1.01 (0.95-1.08) | 0.90 (0.78-1.03) | 0.94 (0.64-1.39) |
| <b>Cardiovascular diseases</b>    |                                             |                  |                  |                  |                  |                  |
| Myocardial infarction             | 0.80 (0.68-0.93)                            | 1.01 (0.76-1.34) | 1.08 (0.39-2.93) | 0.88 (0.77-1.00) | 0.77 (0.59-1.00) | 1.13 (0.53-2.41) |
| No myocardial infarction          | 1.02 (0.96-1.09)                            | 1.05 (0.94-1.17) | 1.06 (0.85-1.31) | 1.04 (0.98-1.10) | 0.98 (0.89-1.08) | 0.91 (0.72-1.15) |
| Congestive heart failure          | 0.87 (0.76-0.99)                            | 0.74 (0.55-1.01) | 1.90 (0.71-5.10) | 0.87 (0.78-0.97) | 0.85 (0.67-1.08) | 0.51 (0.24-1.07) |
| No congestive heart failure       | 1.02 (0.95-1.08)                            | 1.10 (0.99-1.22) | 1.03 (0.83-1.28) | 1.05 (0.98-1.11) | 0.97 (0.87-1.07) | 0.95 (0.76-1.20) |
| Atrial fibrillation or flutter    | 0.97 (0.87-1.07)                            | 0.94 (0.77-1.14) | 1.00 (0.58-1.72) | 0.99 (0.90-1.08) | 0.93 (0.79-1.09) | 0.89 (0.51-1.55) |
| No atrial fibrillation or flutter | 1.00 (0.93-1.07)                            | 1.08 (0.96-1.22) | 1.02 (0.81-1.28) | 1.01 (0.94-1.08) | 0.95 (0.85-1.06) | 0.87 (0.68-1.12) |
| Angina pectoris                   | 0.94 (0.84-1.05)                            | 1.10 (0.90-1.35) | 0.99 (0.59-1.64) | 0.97 (0.87-1.07) | 0.86 (0.72-1.04) | 0.67 (0.41-1.08) |
| No angina pectoris                | 1.01 (0.94-1.08)                            | 1.01 (0.90-1.14) | 1.05 (0.83-1.33) | 1.02 (0.96-1.08) | 0.98 (0.88-1.09) | 1.02 (0.80-1.30) |
| Hypertension                      | 1.01 (0.93-1.09)                            | 1.06 (0.92-1.22) | 0.81 (0.59-1.11) | 0.96 (0.88-1.04) | 0.95 (0.83-1.09) | 0.82 (0.59-1.14) |
| No hypertension                   | 0.97 (0.90-1.05)                            | 1.03 (0.89-1.19) | 1.15 (0.87-1.53) | 1.04 (0.97-1.11) | 0.95 (0.84-1.07) | 0.90 (0.67-1.21) |
| <b>Other diseases</b>             |                                             |                  |                  |                  |                  |                  |
| Diabetes                          | 1.02 (0.91-1.16)                            | 1.03 (0.81-1.32) | 1.16 (0.61-2.24) | 1.05 (0.93-1.18) | 0.91 (0.73-1.15) | 0.84 (0.39-1.82) |
| No diabetes                       | 0.98 (0.92-1.04)                            | 1.04 (0.93-1.17) | 1.03 (0.82-1.29) | 1.00 (0.94-1.06) | 0.96 (0.87-1.06) | 0.91 (0.72-1.15) |
| Kidney disease                    | 1.01 (0.81-1.27)                            | 1.37 (0.94-1.99) | -                | 0.88 (0.71-1.09) | 0.95 (0.66-1.37) | 1.06 (0.16-6.86) |
| No kidney disease                 | 0.99 (0.93-1.05)                            | 1.02 (0.92-1.14) | 1.01 (0.81-1.25) | 1.02 (0.96-1.08) | 0.95 (0.86-1.04) | 0.87 (0.69-1.09) |

<sup>a</sup>Adjusted for sex, age groups, and individual comorbidities and comedICATIONS listed in Table 1.
